# Supplementary material for: Network proteomics of the Lewy body dementia brain reveals presynaptic signatures distinct from Alzheimer’s disease
Source: PubMed Central journal article supplement (PMC11302177; doi:10.1186/s13024-024-00749-1), 2024-08-06

**A** UPenn LB Module Preservation in ROSMAP LB Network

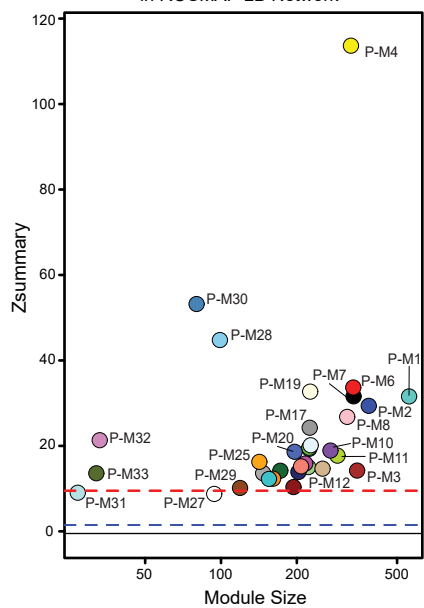

**B**

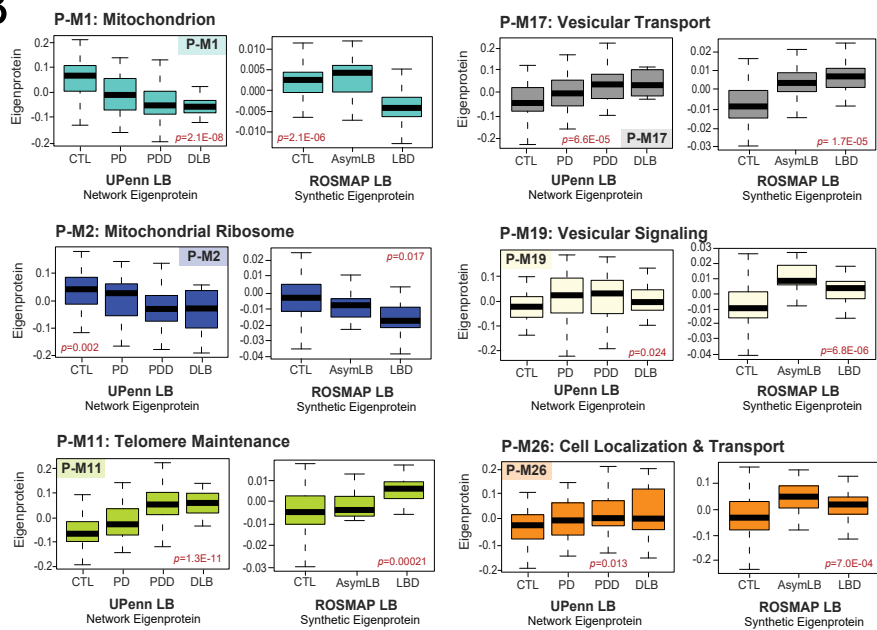

Supplement: 13024_2024_749_MOESM3_ESM.pdf [file 13024_2024_749_MOESM3_ESM.pdf]
